# Supplementary material for: Phenolic Profile and Bioactivity Changes of Lotus Seedpod and Litchi Pericarp Procyanidins: Effect of Probiotic Bacteria Biotransformation
Source: MDPI journal article supplement (doi:10.3390/antiox12111974), 2023-11-07
Supplement: s1 [file s1]

## Supporting Information

### Phenolic Profile and Bioactivity Changes of Lotus Seedpod and Litchi Pericarp Procyanidins: Effect of Probiotic Bacteria Biotransformation

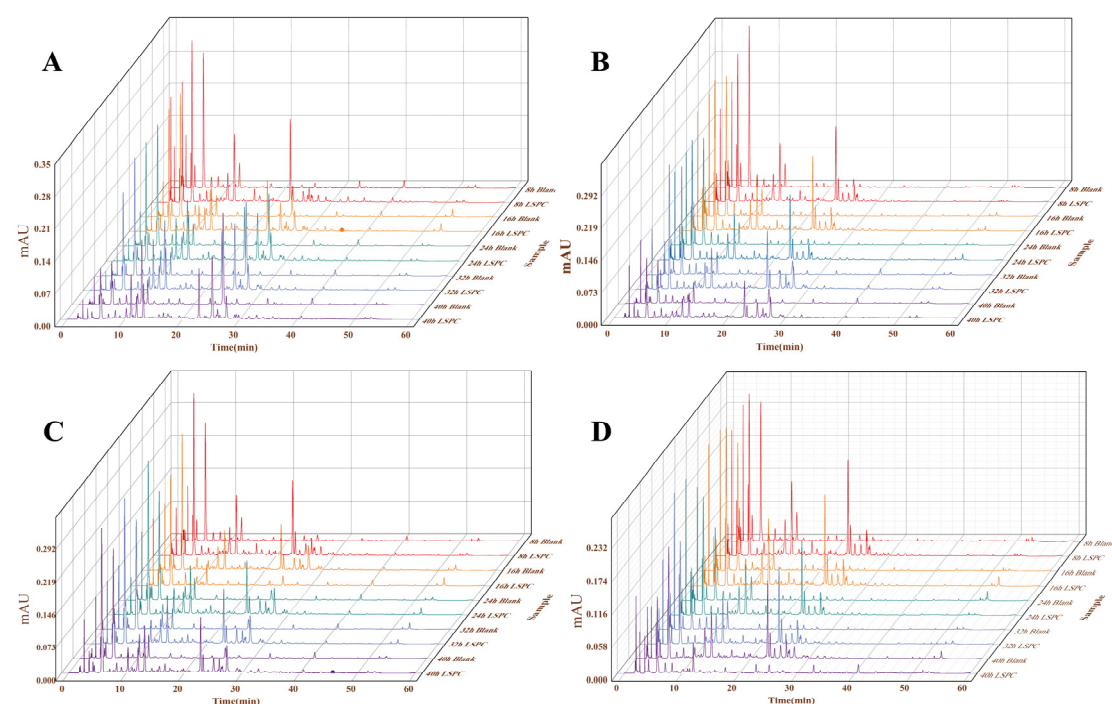

**Figure. S1** Changes in procyanidin composition of LSPC metabolites during 48h incubated by *Lp90* (A), *ST81* (B), *HN001* (C) and *PP06* (D).

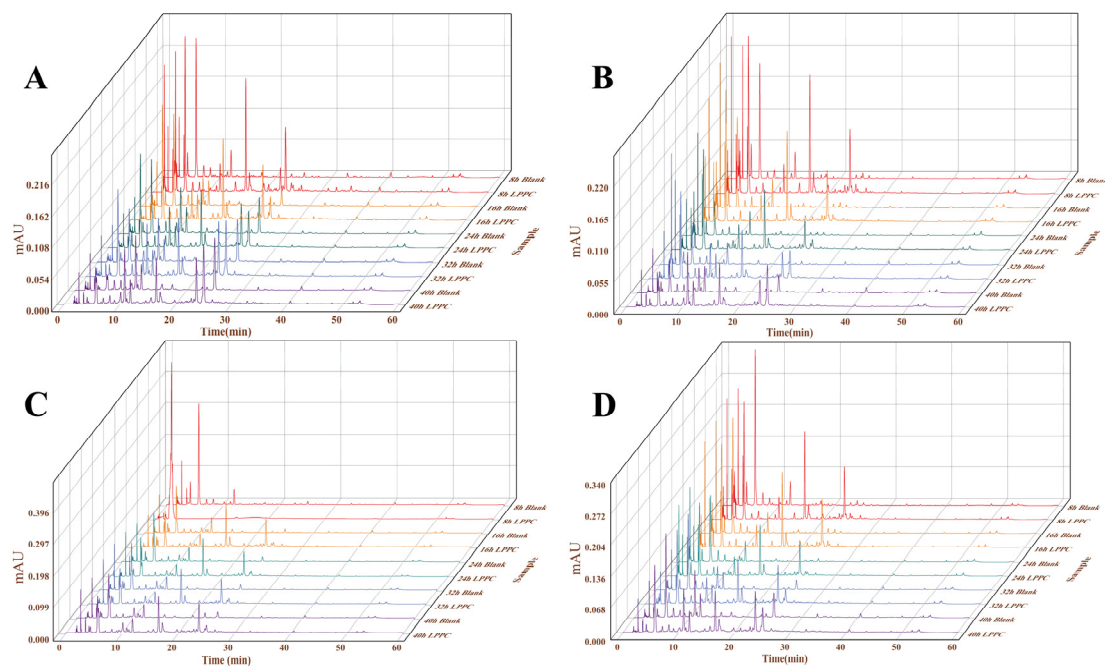

**Figure. S2** Changes in procyanidin composition of LPPC metabolites during 48h incubated by *Lp90* (A), *ST81* (B), *HN001* (C) and *PP06* (D).

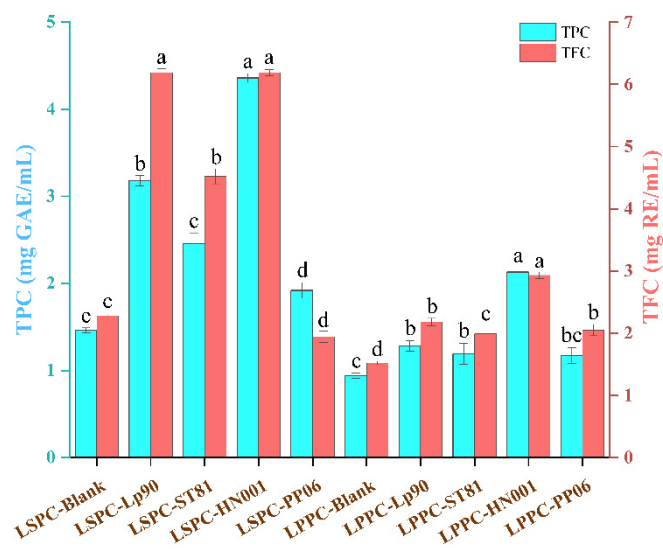

**Figure S3** The TPC & TFC in the metabolites of LSPC and LPPC after 16 h of fermentation. Different lowercase letters indicate significant differences between metabolites from various LABs by the Tukey test ( $p < 0.05$ )

**Table S1.** Compounds identification, compound formula, retention times, measured m/z of molecular and mass fragments (MS/MS) in LSPC and LPPC respectively.

| Sample | No. | Putative compounds        | *RT<br>min | m/z      | MS/MS              | Reference |
|--------|-----|---------------------------|------------|----------|--------------------|-----------|
| LSPC   | S1  | Procyanidin B3            | 11.86      | 579.1492 | 450.0918, 287.0523 | [1]       |
|        | S2  | Catechin                  | 13.11      | 291.0861 | 139.0426           | [1]       |
|        | S3  | Procyanidin B2            | 16.50      | 579.1492 | 291.0936           | [1,2]     |
|        | S4  | Rutin                     | 22.71      | 610.0346 | 465.1029, 303.5012 | [3]       |
|        | S5  | Kaempferol 3-O-glucoside  | 24.96      | 449.1079 | 287.0511           | [2,3]     |
|        | S6  | Myricetin 3-O-glucoside   | 26.35      | 479.1208 | 479.1208, 317.0725 | [1]       |
|        | S7  | Syringetin 3-O-glucoside  | 26.52      | 509.1290 | 347.0823, 348.0814 | [2]       |
| LPPC   | P1  | Catechin                  | 14.64      | 291.0725 | 13 9.0433          | [1,4]     |
|        | P2  | (-)-Epicatechin           | 16.47      | 291.0862 | 273.0375, 165.0191 | [1,2]     |
|        | P3  | A-type procyanidin trimer | 17.14      | 865.1964 | 287.0529           | [1,3]     |
|        | P4  | Procyanidin A2            | 26.52      | 577.1335 | 287.0511           | [2]       |

\*Rt. retention

1. Lv, Q.; Luo, F.; Zhao, X.; Liu, Y.; Hu, G.; Sun, C.; Li, X.; Chen, K. Identification of proanthocyanidins from litchi (*Litchi chinensis* Sonn.) pulp by LC-ESI-Q-TOF-MS and their antioxidant activity. *PLoS One*. 2015, 10, e0120480. doi:10.1371/journal.pone.0120480.
2. Lyu, Q.; Kuo, T.H.; Sun, C.; Chen, K.; Hsu, C.C.; Li, X. Comprehensive structural characterization of phenolics in litchi pulp using tandem mass spectral molecular networking. *Food Chem*. 2019, 282, 9-17. doi:10.1016/j.foodchem.2019.01.001.
3. Xiao, J.S.; Xie, B.J.; Cao, Y.P.; Wu, H.; Sun, Z.D.; Xiao, D. Characterization of oligomeric procyanidins and identification of quercetin glucuronide from lotus (*Nelumbo nucifera* Gaertn.) Seedpod. *J Agr Food Chem*. 2012, 60, 2825-2829. doi:10.1021/jf205331e.
4. Zheng, Z.P.; Tan, H.Y.; Chen, J.; Wang, M. Characterization of tyrosinase inhibitors in the twigs of *Cudrania tricuspidata* and their structure-activity relationship study. *Fitoterapia*. 2013, 84, 242-247. doi:10.1016/j.fitote.2012.12.006.
